# Supplementary material for: Mapping global leaf inclination angle (LIA) based on field measurement data
Source: Copernicus journal article supplement (doi:10.5194/essd-2024-325), 2024-08-14
Supplement: Supplementary file 1 [file essd-2024-325-supplement.pdf]

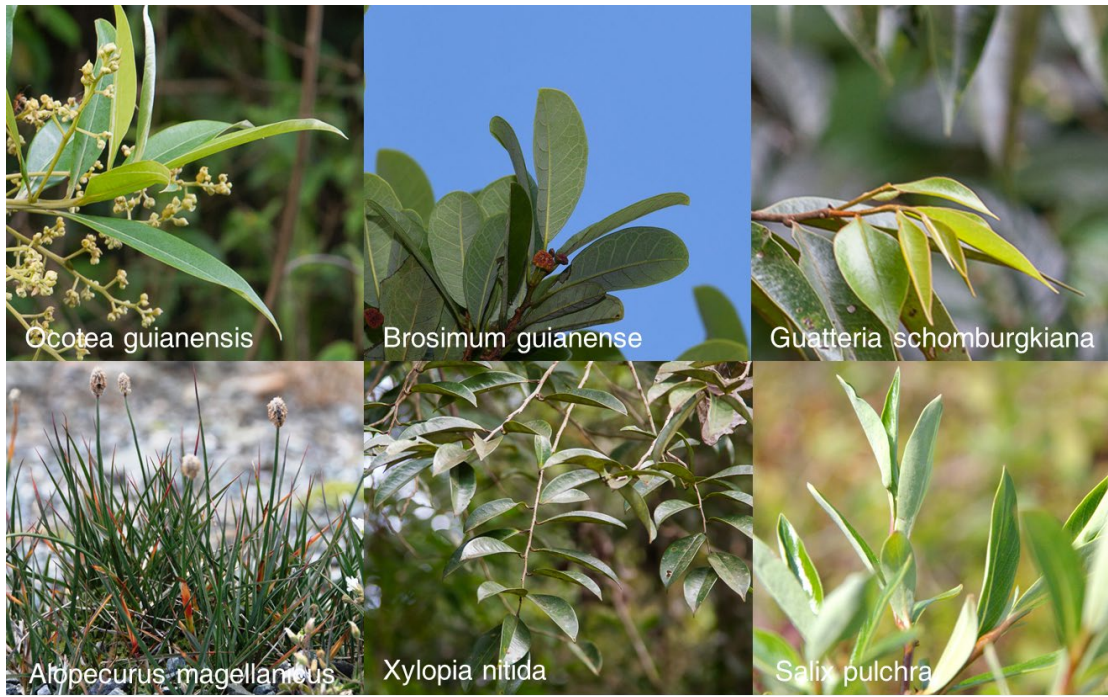

**Fig. S1. Leveled digital photography of several plant species.**

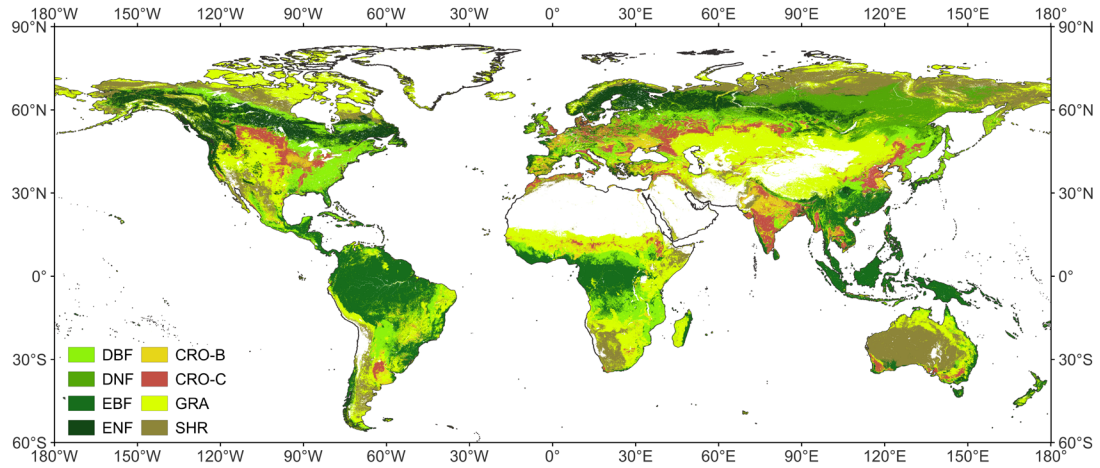

**Fig. S2. MODIS plant function type map aggregated from 2001–2022. DBF: Deciduous broadleaf forest, DNF: Deciduous needleleaf forest, EBF: Evergreen broadleaf forest, ENF: Evergreen needleleaf forest, CRO-B: Broadleaf croplands, CRO-C: Cereal croplands, GRA: Grass, SHR: Shrub.**

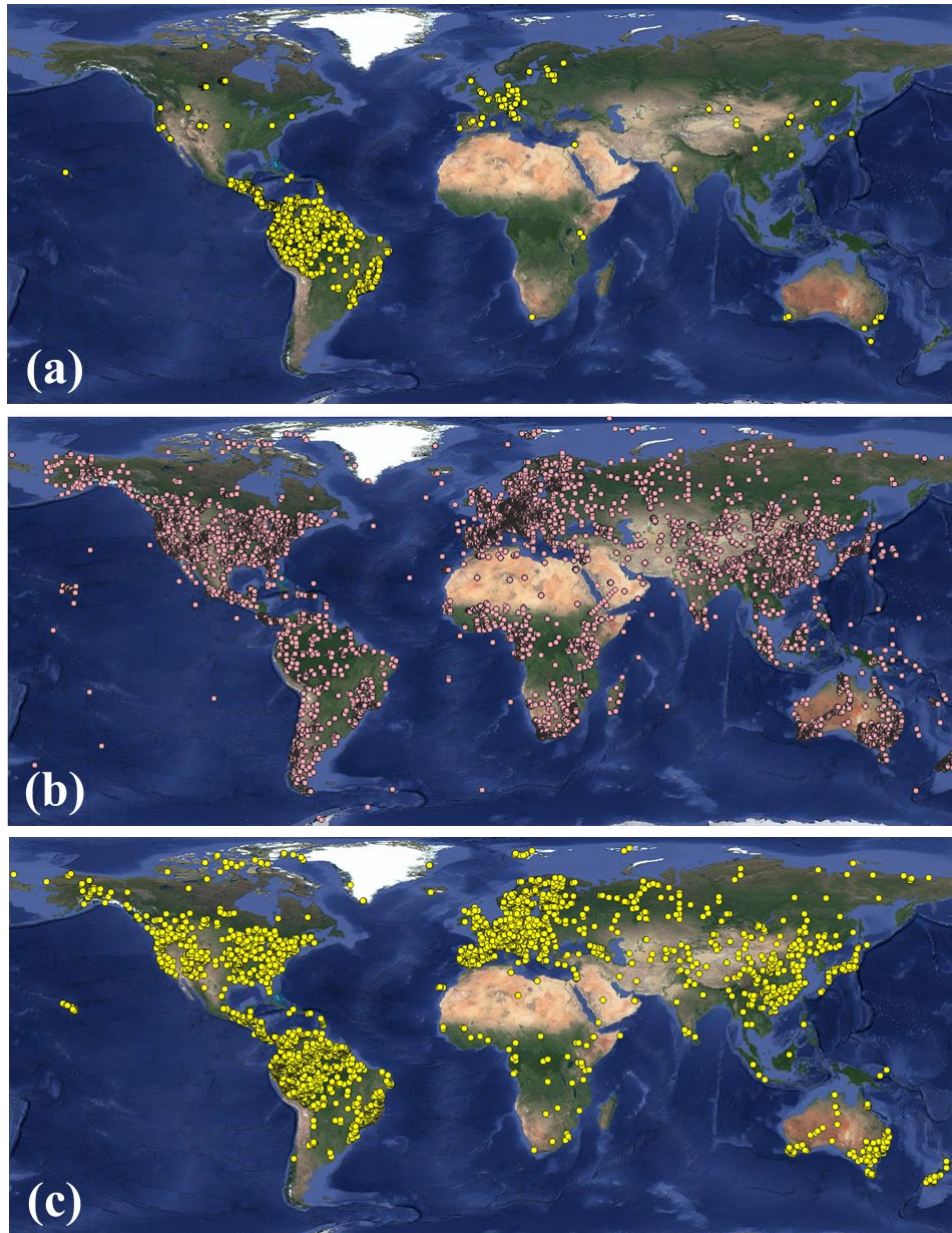

**Fig. S3. Spatial distribution of the LIA measurements before (a) and after (c) spatial expansion. (b) shows the TRY species location. Base image from © Google Earth.**

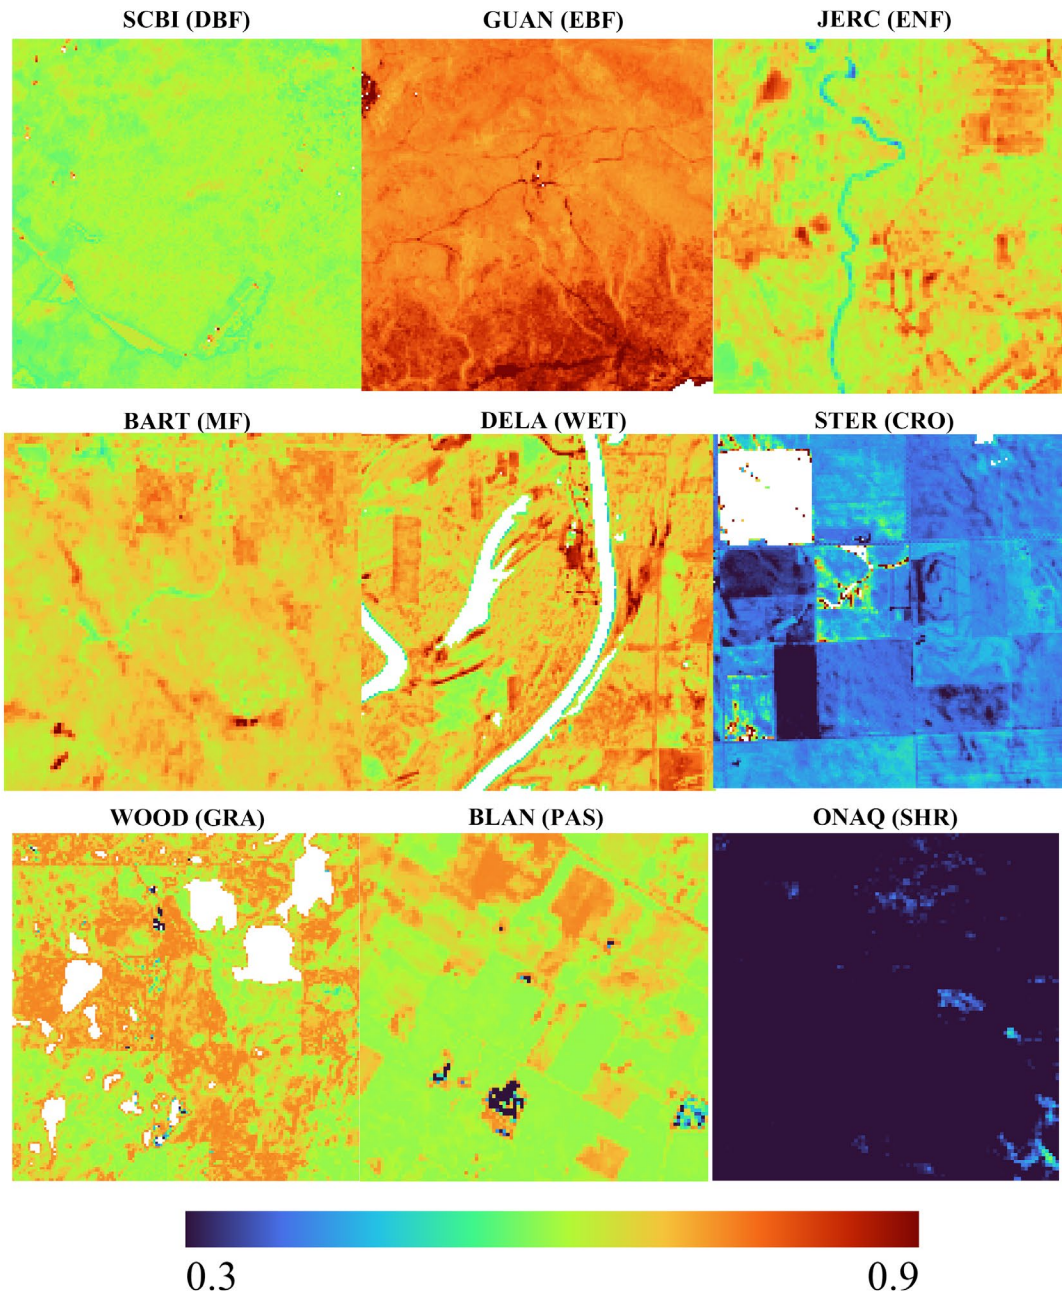

**Fig. S4. High-resolution  $G(0)$  reference maps on several GBOV sites. Refer to Table S1 for the site information.**

**Table S1. Global GBOV and DIRECT 2.1 field measurement sites used in this study. The GBOV biome type was determined from the maximum percentage of the land cover type within a 3 km × 3 km area centered on the site. The DIRECT 2.1 biome type was from the dataset. In the Continuity column, “Y” (“N”) indicates > 5 (otherwise) continuous measurements. For the biome-type acronyms, refer to Fig. 2.**

| Site              | Code              | Latitude | Longitude | Biome | Year                                  | Project    | Continuity |
|-------------------|-------------------|----------|-----------|-------|---------------------------------------|------------|------------|
| 25de Mayo_Alfalfa | 25de Mayo_Alfalfa | -37.91   | -67.75    | CRO   | 2014                                  | DIRECT 2.1 | N          |
| 25de Mayo_Shurb   | 25de Mayo_Shurb   | -37.94   | -67.79    | SHR   | 2014                                  | DIRECT 2.1 | N          |
| AHSPECT-CON       | AHSPECT-CON       | 43.97    | 0.34      | CRO   | 2015                                  | DIRECT 2.1 | N          |
| AHSPECT-CRE       | AHSPECT-CRE       | 43.99    | -0.05     | CRO   | 2015                                  | DIRECT 2.1 | N          |
| AHSPECT-MTO       | AHSPECT-MTO       | 43.57    | 1.37      | CRO   | 2015                                  | DIRECT 2.1 | N          |
| AHSPECT-PEY       | AHSPECT-PEY       | 43.67    | 0.22      | CRO   | 2015                                  | DIRECT 2.1 | N          |
| AHSPECT-SAV       | AHSPECT-SAV       | 43.82    | 1.17      | CRO   | 2015                                  | DIRECT 2.1 | N          |
| AHSPECT-URG       | AHSPECT-URG       | 43.64    | -0.43     | CRO   | 2015                                  | DIRECT 2.1 | N          |
| Albufera          | Albufera          | 39.27    | -0.32     | CRO   | 2014                                  | DIRECT 2.1 | N          |
| Barrax            | Barrax            | 39.07    | -2.10     | CRO   | 2004, 2005, 2009,<br>2010, 2014, 2015 | DIRECT 2.1 | N          |
| Camerons          | Camerons          | -32.60   | 116.25    | EBF   | 2004                                  | DIRECT 2.1 | N          |
| Collelongo        | Collelongo        | 41.85    | 13.59     | DBF   | 2015                                  | DIRECT 2.1 | N          |
| Demmin            | Demmin            | 53.89    | 13.21     | CRO   | 2004                                  | DIRECT 2.1 | N          |
| Donga             | Donga             | 9.77     | 1.78      | GRA   | 2005                                  | DIRECT 2.1 | N          |
| Gnangara          | Gnangara          | -31.53   | 115.88    | DBF   | 2004                                  | DIRECT 2.1 | N          |
| Hailun            | Hailun            | 47.41    | 126.82    | CRO   | 2016                                  | DIRECT 2.1 | Y          |
| Honghe            | Honghe            | 47.65    | 133.52    | CRO   | 2012, 2019                            | DIRECT 2.1 | Y          |
| LaReina_Cordoba_1 | LaReina_Cordoba_1 | 37.82    | -4.86     | CRO   | 2014                                  | DIRECT 2.1 | N          |

|                                      |                      |        |         |     |                  |            |   |
|--------------------------------------|----------------------|--------|---------|-----|------------------|------------|---|
| LaReina_Cordoba_2                    | LaReina_Cordoba_2    | 37.79  | -4.83   | CRO | 2014             | DIRECT 2.1 | N |
| Larose                               | Larose               | 45.38  | -75.22  | MF  | 2003             | DIRECT 2.1 | N |
| Liria                                | Liria                | 39.75  | -0.70   | ENF | 2017             | DIRECT 2.1 | N |
| Moncada                              | Moncada              | 39.52  | -0.39   | CRO | 2014, 2017       | DIRECT 2.1 | N |
| Muragua-Upper-Tana                   | Muragua-Upper-Tana   | -0.77  | 36.97   | CRO | 2016             | DIRECT 2.1 | N |
| Plan_De_Dieu                         | Plan_De_Dieu         | 44.20  | 4.95    | CRO | 2004             | DIRECT 2.1 | N |
| Pshenichne                           | PSH                  | 50.08  | 30.23   | CRO | 2013, 2014, 2015 | DIRECT 2.1 | Y |
| SanFernando                          | SanFernando          | -34.72 | -71.00  | CRO | 2015             | DIRECT 2.1 | N |
| Sonian                               | Sonian               | 50.77  | 4.41    | MF  | 2004             | DIRECT 2.1 | N |
| SouthWest_1                          | SW1                  | 43.55  | 1.09    | CRO | 2013             | DIRECT 2.1 | Y |
| SouthWest_2                          | SW2                  | 43.45  | 1.15    | CRO | 2013             | DIRECT 2.1 | Y |
| Utiel                                | Utiel                | 39.58  | -1.26   | CRO | 2006             | DIRECT 2.1 | N |
| Wankama                              | Wankama              | 13.65  | 2.64    | GRA | 2005             | DIRECT 2.1 | N |
| Bartlett<br>Forest                   | Experimental<br>BART | 44.06  | -71.29  | MF  | 2014-2019        | GBOV       | Y |
| Blandy Experimental Farm             | BLAN                 | 39.06  | -78.07  | PAS | 2015-2019        | GBOV       | Y |
| Central Plains Experimental<br>Range | CPER                 | 40.82  | -104.75 | GRA | 2014-2019        | GBOV       | Y |
| Disney Wilderness Preserve           | DELA                 | 32.54  | -87.80  | WET | 2016-2019        | GBOV       | Y |
| Disney Wilderness Preserve           | DSNY                 | 28.13  | -81.44  | WET | 2013-2019        | GBOV       | Y |
| Guanica Forest                       | GUAN                 | 17.97  | -66.87  | EBF | 2015-2019        | GBOV       | Y |
| Harvard Forest                       | HARV                 | 42.54  | -72.17  | MF  | 2014-2019        | GBOV       | Y |
| Jones Ecological Research<br>Center  | JERC                 | 31.19  | -84.47  | ENF | 2013-2019        | GBOV       | Y |
| Jornada                              | JORN                 | 32.59  | -106.84 | SHR | 2015-2019        | GBOV       | Y |

|                                               |      |       |         |     |           |      |   |
|-----------------------------------------------|------|-------|---------|-----|-----------|------|---|
| Lajas Experimental Station                    | LAJA | 18.02 | -67.08  | PAS | 2016-2019 | GBOV | Y |
| Moab                                          | MOAB | 38.25 | -109.39 | SHR | 2015-2019 | GBOV | Y |
| Niwot Ridge Mountain<br>Research Station      | NIWO | 40.05 | -105.58 | SHR | 2015-2019 | GBOV | Y |
| North Sterling                                | STER | 40.46 | -103.03 | CRO | 2014-2019 | GBOV | Y |
| Oak Ridge                                     | ORNL | 35.96 | -84.28  | DBF | 2014-2019 | GBOV | Y |
| Onaqui                                        | ONAQ | 40.18 | -112.45 | SHR | 2014-2019 | GBOV | Y |
| Ordway-Swisher Biological<br>Station          | OSBS | 29.68 | -82.01  | ENF | 2013-2019 | GBOV | Y |
| Santa Rita Experimental<br>Range              | SRER | 31.91 | -110.84 | SHR | 2016-2019 | GBOV | Y |
| Smithsonian Conservation<br>Biology Institute | SCBI | 38.89 | -78.14  | DBF | 2014-2019 | GBOV | Y |
| Smithsonian Environmental<br>Research Center  | SERC | 38.89 | -76.56  | DBF | 2015-2019 | GBOV | Y |
| Steigerwaldt Land Services                    | STEI | 45.51 | -89.59  | MF  | 2015-2019 | GBOV | Y |
| Talladega National Forest                     | TALL | 32.95 | -87.39  | DBF | 2014-2019 | GBOV | Y |
| UNDERC                                        | UNDE | 46.23 | -89.54  | WET | 2014-2019 | GBOV | Y |
| Woodworth                                     | WOOD | 47.13 | -99.24  | GRA | 2014-2019 | GBOV | Y |

**Table S2. Typical mean inclination angle (MLA) for different crop types. STD is the standard deviation.**

| Crop type  | MLA (°) | STD (°) | Crop type   | MLA (°) | STD (°) |
|------------|---------|---------|-------------|---------|---------|
| Barley     | 51.60   | —       | Coffee      | 39.10   | —       |
| Cotton     | 42.70   | 2.40    | Cucumber    | 32.70   | —       |
| Faba bean  | 27.10   | —       | Horse beans | 38.85   | 4.55    |
| Lucerne    | 48.10   | —       | Lupin       | 17.60   | —       |
| Maize      | 54.01   | 14.42   | Oats        | 63.20   | —       |
| Potato     | 35.78   | 4.80    | Rape        | 36.85   | 4.27    |
| Rice       | 66.67   | 5.12    | Sesame      | 40.12   | —       |
| Sorghum    | 59.70   | 12.73   | Soybean     | 53.66   | 8.55    |
| Sugar beet | 42.90   | 4.25    | Sunflower   | 36.15   | 5.19    |
| Tobacco    | 46.13   | 9.75    | Wheat       | 59.30   | 14.00   |



**Table S3. Predefined leaf inclination angle values in the CLM5 model ([Lawrence et al. 2019](#); [Majasalmi and Bright 2019](#)). The mean leaf inclination angle (MLA) is computed from the inclination index ( $\chi_L$ ) ( $MLA = \arccos(\frac{1+\chi_L}{2})$ ). EBS: evergreen broadleaf shrub, DBS: deciduous broadleaf shrub. See Fig. 1 for other acronyms.**

| Plant functional type                                                                                     | $\chi_L$ | MLA (°) |
|-----------------------------------------------------------------------------------------------------------|----------|---------|
| Temperate ENF, boreal ENF, boreal DNF, temperate EBS                                                      | 0.01     | 59.67   |
| Tropical EBF, temperate EBF                                                                               | 0.10     | 56.63   |
| Tropical DBF                                                                                              | 0.01     | 59.67   |
| Temperate and boreal DBF and DBS                                                                          | 0.25     | 51.32   |
| GRA, C3 crop                                                                                              | -0.30    | 69.51   |
| Temperate corn, spring wheat, temperate soybean, cotton, rice, sugarcane, tropical corn, tropical soybean | -0.50    | 75.52   |

## References

- Lawrence, D.M., Fisher, R.A., Koven, C.D., Oleson, K.W., Swenson, S.C., Bonan, G., Collier, N., Ghimire, B., Van Kampenhout, L., & Kennedy, D. (2019). The Community Land Model version 5: Description of new features, benchmarking, and impact of forcing uncertainty. *Journal of Advances in Modeling Earth Systems*, *11*, 4245-4287
- Majasalmi, T., & Bright, R.M. (2019). Evaluation of leaf-level optical properties employed in land surface models. *Geoscientific Model Development*, *12*, 3923-3938
