# Supplementary material for: Mapping global leaf inclination angle (LIA) based on field measurement data
Source: Copernicus journal article supplement (doi:10.5194/essd-2024-325), 2024-08-14
Supplement: Supplementary file [file essd-2024-325-AC1-supplement.pdf]

1 **Referee #1**

2  
3 This manuscript describes an effort to make a global reference map of leaf inclination  
4 angle by combining leaf angle observations (from the TRY database and extracted from  
5 images) with ancillary data (including plant functional/crop types, reflectance, BRDF,  
6 climate, topography) and a random forest approach. Results are compared to other  
7 available data related to leaf angle distributions from the GBOV and DIRECT databases.

8  
9 The clearly written manuscript provides a compelling justification for why consistent  
10 global leaf angle data would be widely useful. The authors note the challenge of sparse  
11 leaf angle observations, and while they have devised some creative ways to expand  
12 those observations to train the random forest model, some elements of the methods and  
13 evaluation have the potential to create consequential bias.

14  
15 We thank the referee for the recognition and insightful comments that help us improve  
16 the manuscript. We have noted the biases in Fig. 13 and discussed their causes in section  
17 4.1 (Line 346-359).

18 *Due to the lack of high-resolution reference MLA, the global MLA was evaluated*  
19 *through a comparison of the MLA-derived  $G(0)$  with the high-resolution reference*  
20  *$G(0)$  (Fig. 13). The result shows medium consistency but MLA-derived  $G(0)$*   
21 *overestimates at low values ( $< 0.60$ ), especially for CRO, PAS, SHR, and WET.*  
22 ***The overestimation may be partly caused by the underestimation of MLA at high***  
23 ***values that is related to the errors introduced in the sample expansion and***  
24 ***upsampling. These errors are mainly caused by a lack of LIA measurements,***  
25 ***vegetation structural complexity, and seasonal variation. In addition, the***  
26 ***uncertainties in the reference  $G(0)$  may have contributed to the overestimation.***  
27 *The reference  $G(0)$  was derived from the Beer-Lambert law (Eq. (4)) which*  
28 *assumes that the canopy is a **turbid medium**. The turbid medium assumption is*  
29 *unrealistic for complex vegetation (Widlowski et al., 2014). **The angular variation***  
30 ***of CI and the mixture of branches and leaves in generating high-resolution  $G(0)$***   
31 *can also lead to the overestimation. Previous studies have shown that CI increases*  
32 *with the view zenith angle (Fang 2021), which means that the whole  $CI > CI(0)$*   
33 *and can lead to the underestimation of the reference  $G(0)$  (Eq. (6) and (7)). The*  
34 *mixture of branches and leaves may result in the underestimation of the reference*  
35  *$G(0)$  due to the usually higher inclination angle of the trunks (Liu et al. 2019b).*  
36 *Compared with the previous  $G(0)$  derived from global vegetation biophysical*  
37 *products (Eq. (7)) ( $R^2 = 0.11$ ,  $RMSE = 0.53$ ) (Li et al. 2022), the MLA-derived*

38 *G(0)* performs better ( $R^2 = 0.38$ ,  $RMSE = 0.15$ ).

39

40 In addition, Since  $G(\theta)$  varies most significantly in the nadir direction for different  
41 MLA ([Wilson 1959](#)), the uncertainty of  $G(\theta)$  derived from the global MLA in other  
42 directions is smaller than that of  $G(0)$ .

43

44 Specific comments:

45

46 1. The method from Pisek et al. (2011) to derive leaf angle from images requires that  
47 images are leveled. It's not possible to know whether images taken from Google are  
48 leveled, and whether images systematically describe distribution within a plant, and this  
49 can create bias in the dataset.

50

51 The referee is correct that the canopy pictures taken from Google do not contain the  
52 level information directly. In this study, the level state of the canopy images was  
53 determined from the background information, such as the ground level and plant stems.  
54 For each species, more than 75 leaves from different images were collected (Line 110),  
55 reducing the uncertainties from non-leveled photography.

56

57 2. The TRY database was used to determine dominant species in an area to select  
58 species for manual classification from images. No details were given about how this  
59 was done, but datasets from TRY were not designed for this purpose and may not be  
60 representative.

61

62 Thanks to the referee's reminder, we have added more details regarding the species  
63 selection procedure to the manuscript (Line 108).

64 *The TRY species location data (848,919, Fig. S3b) (Jan 03, 2022) were used to*  
65 *obtain the dominant species information in tropical rainforests and the northern*  
66 *tundra. The species location points in these two vegetation types were spatially*  
67 *filtered and the frequency of occurrence for each species was counted. The species*  
68 *with a high frequency of occurrence were selected to measure the LIA.*

69

70 Most species distribution databases, e.g., the Global Biodiversity Information Facility  
71 (GBIF) ([Yesson et al. 2007](#)), only consider the appearance of species but not their  
72 spatial representativeness. The TRY species location database consists of trait  
73 measurements for common species which represent a hundreds-of-square-meters area  
74 around the location. The dominant species was artificially identified by investigators

75 and the spatial representativeness is vital for following LIA upscaling. Therefore, the  
76 TRY species location database was utilized after throughout consideration.

77  
78 3. Leaf angle can be highly variable within a species, depending on factors like leaf  
79 age, plant water status, and canopy position. The manuscript does not report  
80 distributions of replicates per species, and given the large expansion of spatial coverage  
81 from TRY data locations (where leaf angles were not directly observed) it's possible  
82 that training data may not be representative of their species.

83  
84 We agree with the referee about the leaf angle variation from a plant physiological  
85 perspective. It is understood that LIA is influenced by the environment and varies  
86 within a species.

87  
88 In this study, LIA is the mean leaf inclination angle (MLA) of all leaves at the canopy  
89 or pixel scale, not for a single leaf. For a site, the LIA of multiple leaves at different  
90 heights and orientations are obtained and averaged to obtain a robust MLA ([Chianucci  
91 et al. 2018](#); [Pisek and Adamson 2020](#)). The MLA partly mitigates the impact of canopy  
92 position, sunlit and shaded leaves, branching patterns, stem elongation, and species-  
93 specific genetic traits like phototropism and heliotropism. This kind of mean LIA is  
94 desperately wanted in many remote sensing and land surface modeling studies  
95 ([Lawrence et al. 2019](#); [Li et al. 2023](#); [Majasalmi and Bright 2019](#); [Tang et al. 2016](#);  
96 [Zhao et al. 2020](#)). In those studies, LIA is commonly assumed constant (spherical  
97 distribution, 57.3 degrees) or biome type-specific (assigning a constant value for each  
98 biome). Indeed, these assumptions may not represent the true field measurements  
99 (Tables 3 and 4). Our objective is to provide a more realistic global MLA map for  
100 remote sensing and land surface modeling studies.

101  
102 In this study, the LIA seasonal variations were not considered in the global LIA map  
103 because of the lack of seasonal LIA measurements. As a matter of fact, temporal LIA  
104 variations are usually small, except under extreme situations (unusual). For example,  
105 the LIA variations of European beech forest and eucalyptus in different successional  
106 stages are less than 10 degrees ([le Maire et al. 2011](#); [Liu et al. 2019](#); [Raabe et al. 2015](#)).  
107 Crops generally show higher LIA variations than non-crops ([Biskup et al. 2007](#); [Zhang  
108 et al. 2017](#)). Therefore, many studies have considered LIA as a species-specific static  
109 trait when there are no seasonal field measurements ([Pisek et al. 2022](#); [Raabe et al. 2015](#);  
110 [Toda et al. 2022](#)).

111

112 The global LIA map derived in this study is consistent with field measurements (Tables  
113 3 and 4). This is a significant improvement compared to existing static simplifications  
114 ([Lawrence et al. 2019](#); [Li et al. 2023](#); [Majasalmi and Bright 2019](#); [Tang et al. 2016](#);  
115 [Zhao et al. 2020](#)). In a forthcoming study, we plan to retrieve LIA from remote sensing  
116 and the temporal LIA variation will be considered.

117

118 Thanks to the referee's comment, we have revised the manuscript (Line 151).

119 *Many studies have treated LIA as a species-specific static trait and ignored within-*  
120 *species variations when LIA measurements are limited (Pisek et al., 2022; Toda*  
121 *et al., 2022; Raabe et al., 2015). Following the rationale, the spatial coverage of*  
122 *LIA measurements was expanded, and those records without location information*  
123 *were utilized (section 2.1.1).*

124

125 In addition, we counted the number of locations for different species and found the LIA  
126 replicates per species range from 1 to 330, and most replicates (98%) are less than 50.  
127 We added this information to the manuscript (Line 118).

128

129 4. Some of the products used for upscaling and evaluation themselves depend on  
130 assumptions about leaf angle, including MODIS LAI which was used to upscale the  
131 mean leaf angle data produced here to compare to GBOV and DIRECT data. I expect  
132 that GBOV and DIRECT LAI products also depend on leaf angle assumptions (as  
133 almost all methods of estimating LAI do).

134

135 In the MODIS LAI algorithm, a biome-specific static LIA was used as a priori ([Myneni](#)  
136 [et al. 2002](#)). The LIA is partly considered in the LAI retrieval algorithm and the MODIS  
137 LAI has been widely validated and shows good consistency ([Brown et al. 2020](#); [Yan et](#)  
138 [al. 2021](#)). Therefore, it was used to upscale LIA in the evaluation procedure.

139

140 In GBOV and DIRECT, the high-resolution reference LAI is estimated by the empirical  
141 relationship between reflectance and LAI measurements. The LAI measurements were  
142 obtained with the Miller method (Eq. (1)) which does not require any leaf angular  
143 information (<https://gbov.land.copernicus.eu/products/>).

$$144 \quad LAI = 2 \sum_{i=1}^n \overline{-\ln P(\theta_i)} \cos(\theta_i) \sin(\theta_i) d\theta_i \quad (1)$$

145 Where  $P(\theta_i)$  is the gap fraction value in viewing zenith ring  $i$ . Therefore, the GBOV  
146 and DIRECT data do not dependent on leaf angle assumptions.

147

148 Technical comments:

149

150 1. Line 10: I recommend “trait” instead of “parameter” here when discussing ecological  
151 processes.

152

153 We have revised it.

154

155 2. Line 103: I was confused by the statement “The majority of existing LIA  
156 measurements are located in the mid-latitudes of the Northern Hemisphere.” Because  
157 Figure 1 looks like a huge amount of data are in the American tropics?

158

159 Two different versions of TRY data (V5 and V6) were used and the V6 data provide a  
160 large amount of LIA measurements in the Southern Hemisphere. The original sentence  
161 was deleted.

162

163 3. Line 159: Coefficient of variation in reflectance or something else?

164

165 Yes, it represents the coefficient of variation in reflectance. We have revised it in the  
166 manuscript.

167

168 4. Line 194: The single-parameter ellipsoidal leaf angle distribution seems like a big  
169 assumption. Where there are data to test this, does it seem reasonable?

170

171 Compared to other leaf angle distribution models, the single-parameter ellipsoidal leaf  
172 angle distribution is a relatively more accurate and simpler model and has been used in  
173 many remote sensing studies ([Campbell 1990](#); [Kuusk 2001](#); [Verhoef et al. 2007](#); [Wang  
174 et al. 2007](#)). Therefore, the single-parameter ellipsoidal leaf angle distribution was also  
175 used in this study and its parameter  $\chi$ , the ratio of the horizontal and vertical axes of an  
176 ellipsoid, was first derived from MLA. We have rephrased the original sentence (Line  
177 201).

178

179 *Assuming a single-parameter ellipsoidal leaf angle distribution (Campbell, 1990),  
180 the parameter  $\chi$ , the ratio of the horizontal and vertical axes of an ellipsoid, was  
181 first derived from MLA. Compared to other models, the single-parameter*

181

182 *ellipsoidal leaf angle distribution is a relatively more accurate and simpler model  
183 and has been used in many remote sensing studies ([Kuusk 2001](#); [Verhoef et al.  
2007](#); [Wang et al. 2007](#)).*

184

185 5. Figure 12: Are the distinct peaks in the reference data for different crops in panels b  
186 and c?

187

188 The distinct peaks in the reference sample data are caused by the MLA assignment  
189 manner and the homogeneity of cropland. The crop MLA samples were generated by  
190 assigning typical MLAs (Table S2) for different crops with high-resolution crop maps,  
191 followed by the upscaling (section 2.3.2 Line 188). In the upscaling, the homogeneity  
192 of cropland may result in low sample diversity and distinct peaks.

193

194 We have clarified it in Lines 180 and 188.

195 *Different mapping strategies were employed for noncrops and crops (Fig. 3b)*  
196 *considering the small number of valid crop samples (Fig. 4) and the lack of*  
197 *location information for most crop samples.*

198 *For crops, the measured MLA values were averaged for different crop types as a*  
199 *typical MLA (Table S2). After assigning typical MLAs for different crops with*  
200 *high-resolution crop maps (Table 1), the high-resolution crop MLA were upscaled*  
201 *to 500 m as training samples (Eq. (1)).*

202

## 203 Reference

204

205 Biskup, B., Scharr, H., Schurr, U., & Rascher, U. (2007). A stereo imaging system for measuring  
206 structural parameters of plant canopies. *Plant, Cell and Environment*, 30, 1299-1308

207 Brown, L.A., Meier, C., Morris, H., Pastor-Guzman, J., Bai, G., Lerebourg, C., Gobron, N., Lanconelli,  
208 C., Clerici, M., & Dash, J. (2020). Evaluation of global leaf area index and fraction of absorbed  
209 photosynthetically active radiation products over North America using Copernicus Ground Based  
210 Observations for Validation data. *Remote Sensing of Environment*, 247

211 Campbell, G. (1990). Derivation of an angle density function for canopies with ellipsoidal leaf angle  
212 distributions. *Agricultural and Forest Meteorology*, 49, 173-176

213 Chianucci, F., Pisek, J., Raabe, K., Marchino, L., Ferrara, C., & Corona, P. (2018). A dataset of leaf  
214 inclination angles for temperate and boreal broadleaf woody species. *Annals of Forest Science*, 75,  
215 50-50

216 Kuusk, A. (2001). A two-layer canopy reflectance model. *Journal of Quantitative Spectroscopy and*  
217 *Radiative Transfer*, 71, 1-9

218 Lawrence, D.M., Fisher, R.A., Koven, C.D., Oleson, K.W., Swenson, S.C., Bonan, G., Collier, N.,  
219 Ghimire, B., Van Kampenhout, L., & Kennedy, D. (2019). The Community Land Model version 5:  
220 Description of new features, benchmarking, and impact of forcing uncertainty. *Journal of*  
221 *Advances in Modeling Earth Systems*, 11, 4245-4287

222 le Maire, G., Marsden, C., Verhoef, W., Ponzoni, F.J., Lo Seen, D., Bégué, A., Stape, J.-L., &

223        Nouvellon, Y. (2011). Leaf area index estimation with MODIS reflectance time series and model  
224        inversion during full rotations of Eucalyptus plantations. *Remote Sensing of Environment*, *115*,  
225        586-599

226        Li, S., Fang, H., & Zhang, Y. (2023). Determination of the Leaf Inclination Angle (LIA) through Field  
227        and Remote Sensing Methods: Current Status and Future Prospects. *Remote Sensing*, *15*, 946

228        Liu, J., Skidmore, A.K., Wang, T., Zhu, X., Premier, J., Heurich, M., Beudert, B., & Jones, S. (2019).  
229        Variation of leaf angle distribution quantified by terrestrial LiDAR in natural European beech  
230        forest. *ISPRS Journal of Photogrammetry and Remote Sensing*, *148*, 208-220

231        Majasalmi, T., & Bright, R.M. (2019). Evaluation of leaf-level optical properties employed in land  
232        surface models – example with CLM 5.0. *Geoscientific Model Development Discussions*, 1-24

233        Myneni, R.B., Hoffman, S., Knyazikhin, Y., Privette, J.L., Glassy, J., Tian, Y., Wang, Y., Song, X.,  
234        Zhang, Y., Smith, G.R., Lotsch, A., Friedl, M., Morisette, J.T., Votava, P., Nemani, R.R., &  
235        Running, S.W. (2002). Global products of vegetation leaf area and fraction absorbed PAR from  
236        year one of MODIS data. *Remote Sensing of Environment*, *83*, 214-231

237        Pisek, J., & Adamson, K. (2020). Dataset of leaf inclination angles for 71 different Eucalyptus species.  
238        *Data Brief*, *33*, 106391

239        Pisek, J., Diaz-Pines, E., Matteucci, G., Noe, S., & Rebmann, C. (2022). On the leaf inclination angle  
240        distribution as a plant trait for the most abundant broadleaf tree species in Europe. *Agricultural  
241        and Forest Meteorology*, *323*

242        Raabe, K., Pisek, J., Sonnentag, O., & Annuk, K. (2015). Variations of leaf inclination angle  
243        distribution with height over the growing season and light exposure for eight broadleaf tree  
244        species. *Agricultural and Forest Meteorology*, *214-215*, 2-11

245        Tang, H., Ganguly, S., Zhang, G., Hofton, M.A., Nelson, R.F., & Dubayah, R. (2016). Characterizing  
246        leaf area index (LAI) and vertical foliage profile (VFP) over the United States. *Biogeosciences*,  
247        *13*, 239-252

248        Toda, M., Ishihara, M.I., Doi, K., & Hara, T. (2022). Determination of species-specific leaf angle  
249        distribution and plant area index in a cool-temperate mixed forest from UAV and upward-pointing  
250        digital photography. *Agricultural and Forest Meteorology*, *325*

251        Verhoef, W., Jia, L., Xiao, Q., & Su, Z. (2007). Unified Optical-Thermal Four-Stream Radiative  
252        Transfer Theory for Homogeneous Vegetation Canopies. *IEEE Transactions on Geoscience and  
253        Remote Sensing*, *45*, 1808-1822

254        Wang, W.M., Li, Z.L., & Su, H.B. (2007). Comparison of leaf angle distribution functions: Effects on  
255        extinction coefficient and fraction of sunlit foliage. *Agricultural and Forest Meteorology*, *143*,  
256        106-122

257        Wilson, J.W. (1959). Analysis of the spatial distribution of foliage by two-dimensional point quadrats.  
258        *New Phytologist*, *58*, 92-99

259        Yan, K., Pu, J., Park, T., Xu, B., Zeng, Y., Yan, G., Weiss, M., Knyazikhin, Y., & Myneni, R.B. (2021).  
260        Performance stability of the MODIS and VIIRS LAI algorithms inferred from analysis of long  
261        time series of products. *Remote Sensing of Environment*, *260*

262        Yesson, C., Brewer, P.W., Sutton, T., Caithness, N., Pahwa, J.S., Burgess, M., Gray, W.A., White, R.J.,  
263        Jones, A.C., & Bisby, F.A. (2007). How global is the global biodiversity information facility?  
264        *PLoS ONE*, *2*, e1124

- 265 Zhang, Y., Tang, L., Liu, X., Liu, L., Cao, W., & Zhu, Y. (2017). Modeling the leaf angle dynamics in  
266 rice plant. *PLoS ONE*, *12*, 1-13
- 267 Zhao, J., Li, J., Liu, Q., Xu, B., Yu, W., Lin, S., & Hu, Z. (2020). Estimating fractional vegetation cover  
268 from leaf area index and clumping index based on the gap probability theory. *International*  
269 *Journal of Applied Earth Observation and Geoinformation*, *90*, 102-112
- 270
