# Supplementary material for: Mapping global leaf inclination angle (LIA) based on field measurement data
Source: Copernicus journal article supplement (doi:10.5194/essd-2024-325), 2024-08-14
Supplement: Supplementary file [file essd-2024-325-AC2-supplement.pdf]

1 **Referee #2**

2  
3 This study compiled global Leaf Inclination Angle (LIA) field measurements and  
4 produced the first global 500 m LIA dataset using machine learning. The dataset was  
5 evaluated with the nadir leaf projection function, comparing it against high-resolution  
6 reference data, and the global LIA patterns across different biomes were further  
7 analyzed. While the study is intriguing and generally well-written, I have significant  
8 concerns regarding the reliability of this static, machine learning-based product,  
9 particularly due to the dynamic nature of LIA at the leaf level, limitations in scaling  
10 field measurements to the canopy and ecosystem level, and the lack of effective input  
11 data at the global scale. My specific concerns are outlined below:

12  
13 [We thank the referee for the insightful comments which help us to further improve the](#)  
14 [manuscript. We fully understand the referee's concerns and have provided detailed](#)  
15 [explanations below.](#)

- 16  
17 1. **Dynamic Nature of Leaf-Level LIA:** LIA is highly variable within a canopy, even  
18 for a single species. Observing a tree canopy, one can easily notice the variation in  
19 leaf inclination. To minimize self-shading or optimize light capture, sun and shade  
20 leaves on the same plant may have different inclinations. Moreover, LIA can change  
21 throughout the day to track the sun's movement, across growing seasons, and with  
22 leaf age and developmental stages. Under stress conditions, such as water scarcity  
23 or extreme temperatures, plants may adjust their leaf angles to reduce water loss or  
24 mitigate heat stress by altering turgor pressure. Additionally, variability in LIA is  
25 influenced by branching patterns, stem elongation, and species-specific genetic  
26 traits like phototropism and heliotropism. Given this variability, treating LIA as a  
27 static structural trait oversimplifies its inherently dynamic nature.

28  
29 [We agree with the referee's comments about the dynamic nature of leaf LIA. For plant](#)  
30 [physiologists, it is well known that LIA is influenced by environmental conditions and](#)  
31 [shows temporal variation.](#)

32  
33 [In this study, LIA is the mean leaf inclination angle \(MLA\) of all leaves at the canopy](#)  
34 [or pixel scale, not for a single leaf. For a site, the LIA of multiple leaves at different](#)  
35 [heights and orientations are obtained and averaged to obtain a robust MLA \(\[Chianucci\]\(#\)](#)  
36 [et al. 2018; \[Pisek and Adamson 2020\]\(#\)\). The MLA partly mitigates the impact of height,](#)  
37 [sunlit and shaded leaves, branching patterns, stem elongation, and species-specific](#)

38 genetic traits like phototropism and heliotropism. This kind of mean LIA is desperately  
39 wanted in many remote sensing and land surface modeling studies ([Lawrence et al.](#)  
40 [2019](#); [Li et al. 2023](#); [Majasalmi and Bright 2019](#); [Tang et al. 2016](#); [Zhao et al. 2020](#)).  
41 In those studies, LIA is commonly assumed constant (spherical distribution, 57.3  
42 degrees) or biome type-specific (assigning a constant value for each biome). Indeed,  
43 these assumptions may not represent the true field measurements (Tables 3 and 4). Our  
44 objective is to provide a more realistic global MLA map for remote sensing and land  
45 surface modeling studies.

46  
47 In this study, the LIA seasonal variations were not considered in the global LIA map  
48 because of the lack of seasonal LIA measurements. As a matter of fact, temporal LIA  
49 variations are usually small, except under extreme situations (unusual). For example,  
50 the LIA variations of European beech forest and eucalyptus in different successional  
51 stages are less than 10 degrees ([le Maire et al. 2011](#); [Liu et al. 2019](#); [Raabe et al. 2015](#)).  
52 Crops generally show higher LIA variations than non-crops ([Biskup et al. 2007](#); [Zhang](#)  
53 [et al. 2017](#)). Therefore, many studies have considered LIA as a species-specific static  
54 trait when there are no seasonal field measurements ([Pisek et al. 2022](#); [Raabe et al. 2015](#);  
55 [Toda et al. 2022](#)).

56  
57 The global LIA map derived in this study is consistent with field measurements (Tables  
58 3 and 4). This is a significant improvement compared to existing static simplifications  
59 ([Lawrence et al. 2019](#); [Li et al. 2023](#); [Majasalmi and Bright 2019](#); [Tang et al. 2016](#);  
60 [Zhao et al. 2020](#)). In a forthcoming study, we plan to retrieve LIA from remote sensing  
61 and the temporal LIA variation will be considered.

62

63 Thanks to the referee's comment, we have revised the manuscript (Line 151).

64 *Many studies have treated LIA as a species-specific static trait and ignored within-*  
65 *species variations when LIA measurements are limited (Pisek et al., 2022; Toda*  
66 *et al., 2022; Raabe et al., 2015). Following the rationale, the spatial coverage of*  
67 *LIA measurements was expanded, and those records without location information*  
68 *were utilized (section 2.1.1).*

69

70 **2. Upscaling LIA Field Measurements:** The LIA field measurements from the TRY  
71 database seem to be primarily site-specific. The method used to upscale these  
72 measurements from the leaf level to the canopy and ecosystem scales is crucial for  
73 modeling accuracy, yet it is unclear in this study. The approach of using a weighted  
74 average of Enhanced Vegetation Index (EVI) to scale LIA from 30 m to 500 m, as

75 per equation (1), raises concerns. What is the solid physical or physiological  
76 rationale for this upscaling method? Without a clear justification, this approach  
77 appears problematic.

78  
79 In field measurement, the entire canopy LIA is calculated as the average of all measured  
80 leaf LIAs weighted by leaf area (de Wit 1965; Zou et al. 2014). Leaves with larger areas  
81 have higher weights. Upscaling LIA from 30 m to 500 m follows the same rationale as  
82 that from leaf to canopy scale. For a 30 m pixel with a higher leaf area index (LAI), the  
83 weight of the pixel is higher. Considering that a linear relationship exists between LAI  
84 and enhanced vegetation index (EVI2) (Alexandridis et al. 2019; Dong et al. 2019), the  
85 LIA was upscaled by EVI2 (Eq. (1)).

86  
87 Following the suggestion, we have explained in the manuscript (Line 165).

88 *In field measurement, the entire canopy LIA is calculated as the average of all*  
89 *measured leaf LIAs weighted by leaf area (Zou et al., 2014; De Wit, 1965). Leaves*  
90 *with larger areas have higher weights. Upscaling LIA from 30 m to 500 m follows*  
91 *the same rationale as that from leaf to canopy scale. For a 30 m pixel with a higher*  
92 *LAI, the weight of the pixel is higher. Therefore, the 500 m MLA was computed as*  
93 *the weighted average of the enhanced vegetation index (EVI2) considering a linear*  
94 *relationship between LAI and EVI2 (Dong et al., 2019; Alexandridis et al., 2019).*

95  
96 3. **Coarse Resolution and Low-Signal Inputs in the Model:** LIA provides detailed  
97 structural information at the leaf level. When using a machine learning model, how  
98 did the authors ensure that the global model inputs listed in Table 1 accurately  
99 represent such low-signal information (also the variations mentioned in comment  
100 #1) at a coarse spatial resolution, which is significantly larger than the leaf level?  
101 Importantly, the MODIS LAI product does not reliably capture LIA in its algorithm.  
102 Furthermore, as seen in Figure 6, NDVI and precipitation are identified as major  
103 factors controlling LIA. What is the specific basis for this, given that both factors  
104 exhibit strong seasonal dynamics? Overall, I think that current optical remote  
105 sensing systems, such as MODIS and Landsat, lack the capability to capture the  
106 subtle structural signal of LIA, as they were not designed for this purpose.

107  
108 We agree with the referee that MODIS and Landsat are not designed for estimating LIA.

109  
110 In this study, the MODIS LAI was only used for the upscaling evaluation of G(0) (Line  
111 219). In the MODIS LAI algorithm, a biome-specific static LIA was used as a priori

112 ([Myneni et al. 2002](#)). This biome-specific LIA is very rough and should (and can) be  
113 improved. It is our goal to generate global pixel-scale LIA.

114

115 The correlation between LIA and NDVI or precipitation has been reported in many  
116 simulation and field studies ([Dong et al. 2019](#); [Jacquemoud et al. 1994](#); [Liu et al. 2012](#);  
117 [Zou and Möttus 2015](#)). This has been explained in section 4.2. Higher LIA means lower  
118 radiation interception, more NIR downward radiation, and lower NIR reflectance ([Liu](#)  
119 [et al. 2012](#)). This results in negative correlations between LIA and NIR reflectance  
120 and vegetation index. The negative correlation between LIA and precipitation relates  
121 to vegetation adaptation. Under suitable climate conditions, horizontal leaves can make  
122 better usage of precipitation and increase the photosynthesis rate ([King 1997](#); [van](#)  
123 [Zanten et al. 2010](#)). Therefore, in this study, the mean and standard deviation of NDVI and  
124 precipitation time series were selected to predict LIA. The mean NDVI and  
125 precipitation represent the average situation for a specific area and correspond to the  
126 typical global LIA.

127

128 In canopy radiation transfer, canopy structure parameters, including leaf area index,  
129 LIA, and clumping index jointly determine the canopy reflectance ([Liang 2005](#); [Ross](#)  
130 [1981](#); [Verhoef 1984](#)). Previous studies have shown that multi-angle reflectance is  
131 sensitive to LIA and can be used to derive the latter ([Goel and Thompson 1984](#);  
132 [Jacquemoud et al. 1994](#); [Jacquemoud et al. 2009](#); [Li et al. 2023](#)). Since MODIS has  
133 multiangle observations, the multiangle information provided in the BRDF product  
134 (MCD43A1 C6.1) was used here as LIA predictors in this study. In contrast, Landsat  
135 lacks a multiangle view and was rarely used for LIA estimation.

136

## 137 **Reference**

138

139 Alexandridis, T.K., Ovakoglou, G., & Clevers, J.G.P.W. (2019). Relationship between MODIS EVI and  
140 LAI across time and space. *Geocarto International*, 35, 1385-1399

141 Biskup, B., Scharr, H., Schurr, U., & Rascher, U. (2007). A stereo imaging system for measuring  
142 structural parameters of plant canopies. *Plant, Cell and Environment*, 30, 1299-1308

143 Chianucci, F., Pisek, J., Raabe, K., Marchino, L., Ferrara, C., & Corona, P. (2018). A dataset of leaf  
144 inclination angles for temperate and boreal broadleaf woody species. *Annals of Forest Science*, 75,  
145 50-50

146 de Wit, C.T. (1965). Photosynthesis of leaf canopies. In: Pudoc

147 Dong, T., Liu, J., Shang, J., Qian, B., Ma, B., Kovacs, J.M., Walters, D., Jiao, X., Geng, X., & Shi, Y.  
148 (2019). Assessment of red-edge vegetation indices for crop leaf area index estimation. *Remote*  
149 *Sensing of Environment*, 222, 133-143

150 Goel, N.S., & Thompson, R.L. (1984). Inversion of vegetation canopy reflectance models for  
151 estimating agronomic variables. V. Estimation of leaf area index and average leaf angle using  
152 measured canopy reflectances. *Remote Sensing of Environment*, 16, 69-85

153 Jacquemoud, S., Flasse, S., Verdebout, J., & Schmuck, G. (1994). Comparison of Several Optimization  
154 Methods To Extract Canopy Biophysical Parameters - Application To Caesar Data, 291-298

155 Jacquemoud, S., Verhoef, W., Baret, F., Bacour, C., Zarco-Tejada, P.J., Asner, G.P., François, C., &  
156 Ustin, S.L. (2009). PROSPECT+SAIL models: A review of use for vegetation characterization.  
157 *Remote Sensing of Environment*, 113, S56-S66

158 King, D.A. (1997). The Functional Significance of Leaf Angle in Eucalyptus. *Australian Journal of*  
159 *Botany*, 45, 619-639

160 Lawrence, D.M., Fisher, R.A., Koven, C.D., Oleson, K.W., Swenson, S.C., Bonan, G., Collier, N.,  
161 Ghimire, B., Van Kampenhout, L., & Kennedy, D. (2019). The Community Land Model version 5:  
162 Description of new features, benchmarking, and impact of forcing uncertainty. *Journal of*  
163 *Advances in Modeling Earth Systems*, 11, 4245-4287

164 le Maire, G., Marsden, C., Verhoef, W., Ponzoni, F.J., Lo Seen, D., Bégué, A., Stape, J.-L., &  
165 Nouvellon, Y. (2011). Leaf area index estimation with MODIS reflectance time series and model  
166 inversion during full rotations of Eucalyptus plantations. *Remote Sensing of Environment*, 115,  
167 586-599

168 Li, S., Fang, H., & Zhang, Y. (2023). Determination of the Leaf Inclination Angle (LIA) through Field  
169 and Remote Sensing Methods: Current Status and Future Prospects. *Remote Sensing*, 15, 946

170 Liang, S. (2005). *Quantitative remote sensing of land surfaces*. John Wiley & Sons

171 Liu, J., Pattey, E., & Jégo, G. (2012). Assessment of vegetation indices for regional crop green LAI  
172 estimation from Landsat images over multiple growing seasons. *Remote Sensing of Environment*,  
173 123, 347-358

174 Liu, J., Skidmore, A.K., Wang, T., Zhu, X., Premier, J., Heurich, M., Beudert, B., & Jones, S. (2019).  
175 Variation of leaf angle distribution quantified by terrestrial LiDAR in natural European beech  
176 forest. *ISPRS Journal of Photogrammetry and Remote Sensing*, 148, 208-220

177 Majasalmi, T., & Bright, R.M. (2019). Evaluation of leaf-level optical properties employed in land  
178 surface models – example with CLM 5.0. *Geoscientific Model Development Discussions*, 1-24

179 Myneni, R.B., Hoffman, S., Knyazikhin, Y., Privette, J.L., Glassy, J., Tian, Y., Wang, Y., Song, X.,  
180 Zhang, Y., Smith, G.R., Lotsch, A., Friedl, M., Morisette, J.T., Votava, P., Nemani, R.R., &  
181 Running, S.W. (2002). Global products of vegetation leaf area and fraction absorbed PAR from  
182 year one of MODIS data. *Remote Sensing of Environment*, 83, 214-231

183 Pisek, J., & Adamson, K. (2020). Dataset of leaf inclination angles for 71 different Eucalyptus species.  
184 *Data Brief*, 33, 106391

185 Pisek, J., Diaz-Pines, E., Matteucci, G., Noe, S., & Rebmann, C. (2022). On the leaf inclination angle  
186 distribution as a plant trait for the most abundant broadleaf tree species in Europe. *Agricultural*  
187 *and Forest Meteorology*, 323

188 Raabe, K., Pisek, J., Sonnentag, O., & Annuk, K. (2015). Variations of leaf inclination angle  
189 distribution with height over the growing season and light exposure for eight broadleaf tree  
190 species. *Agricultural and Forest Meteorology*, 214-215, 2-11

191 Ross, J. (1981). *The radiation regime and architecture of plant stands*. Springer Science & Business

192 Media  
193 Tang, H., Ganguly, S., Zhang, G., Hofton, M.A., Nelson, R.F., & Dubayah, R. (2016). Characterizing  
194 leaf area index (LAI) and vertical foliage profile (VFP) over the United States. *Biogeosciences*,  
195 *13*, 239-252  
196 Toda, M., Ishihara, M.I., Doi, K., & Hara, T. (2022). Determination of species-specific leaf angle  
197 distribution and plant area index in a cool-temperate mixed forest from UAV and upward-pointing  
198 digital photography. *Agricultural and Forest Meteorology*, *325*  
199 van Zanten, M., Pons, T.L., Janssen, J.A.M., Voisenek, L.A.C.J., & Peeters, A.J.M. (2010). On the  
200 Relevance and Control of Leaf Angle. *Critical Reviews in Plant Sciences*, *29*, 300-316  
201 Verhoef, W. (1984). Light scattering by leaf layers with application to canopy reflectance modeling:  
202 The SAIL model. *Remote Sensing of Environment*, *16*, 125-141  
203 Zhang, Y., Tang, L., Liu, X., Liu, L., Cao, W., & Zhu, Y. (2017). Modeling the leaf angle dynamics in  
204 rice plant. *PLoS ONE*, *12*, 1-13  
205 Zhao, J., Li, J., Liu, Q., Xu, B., Yu, W., Lin, S., & Hu, Z. (2020). Estimating fractional vegetation cover  
206 from leaf area index and clumping index based on the gap probability theory. *International*  
207 *Journal of Applied Earth Observation and Geoinformation*, *90*, 102-112  
208 Zou, X., & Möttus, M. (2015). Retrieving crop leaf tilt angle from imaging spectroscopy data.  
209 *Agricultural and Forest Meteorology*, *205*, 73-82  
210 Zou, X., Möttus, M., Tammeorg, P., Torres, C.L., Takala, T., Pisek, J., Mäkelä, P., Stoddard, F.L., &  
211 Pellikka, P. (2014). Photographic measurement of leaf angles in field crops. *Agricultural and*  
212 *Forest Meteorology*, *184*, 137-146
